# Supplementary material
Source: PubMed Central journal article supplement (PMC1678815)
Supplement: JCI0629867sd.pdf [file JCI0629867sd.pdf]

**a**

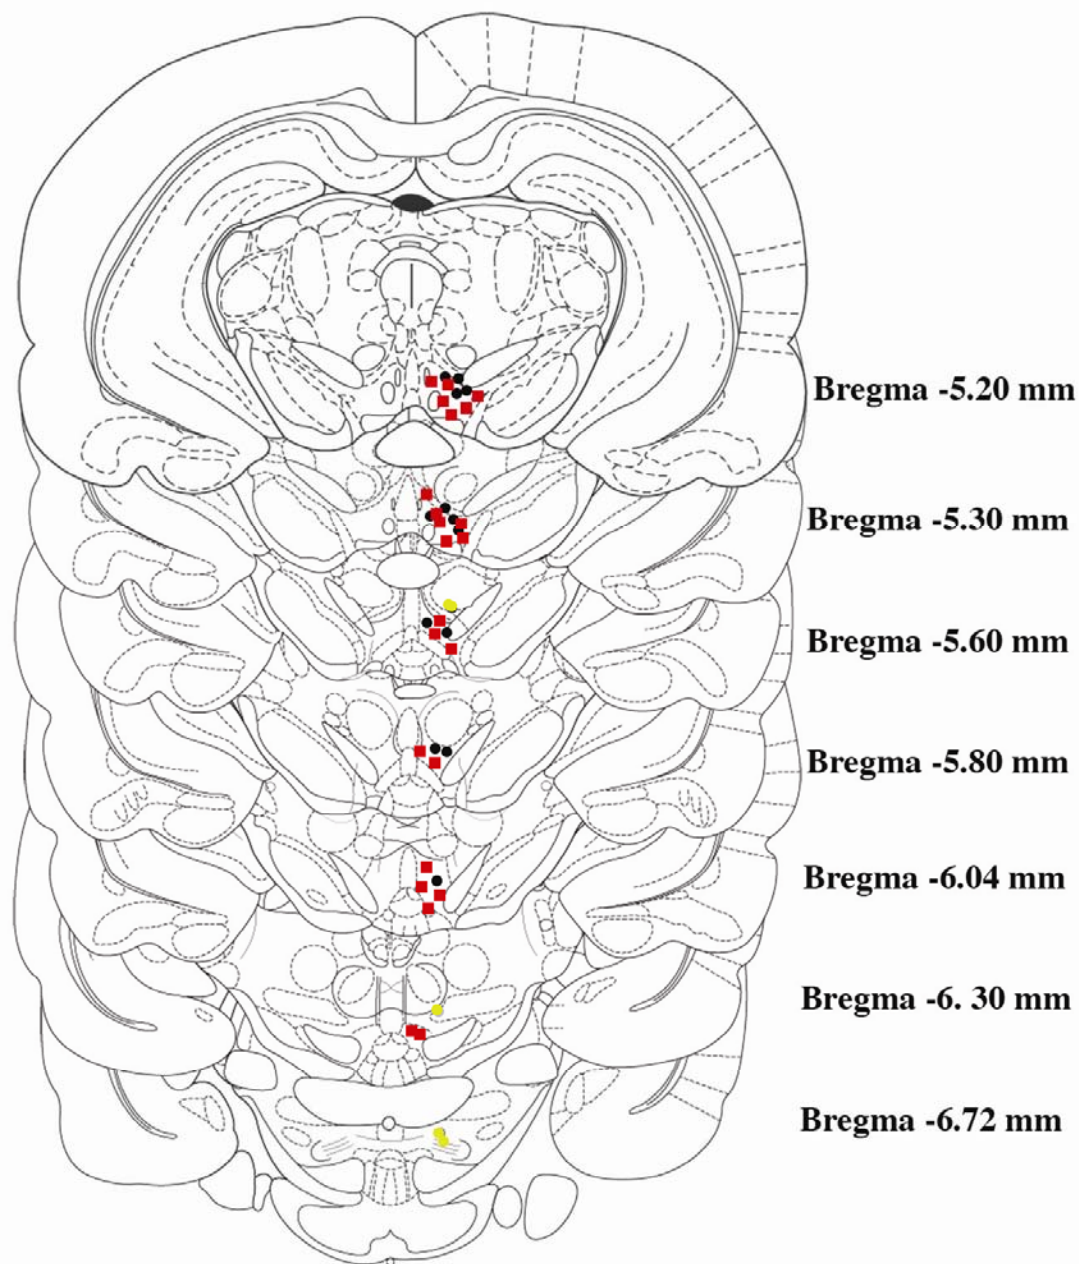

**b**

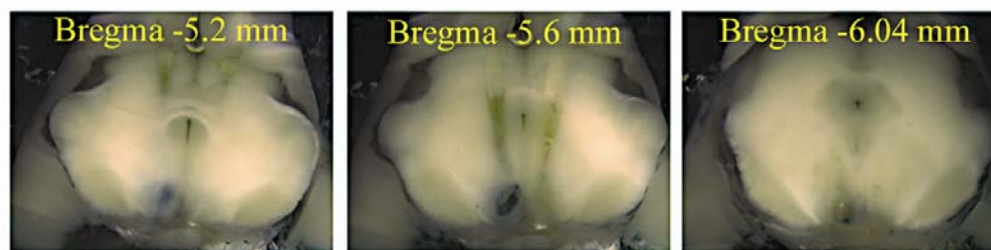

**Suppl. Fig. 1**

**a**

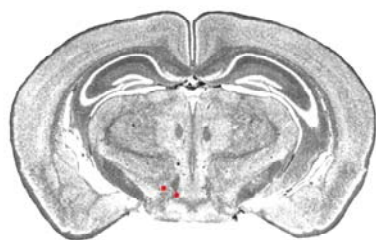

Bregma -3.10 mm

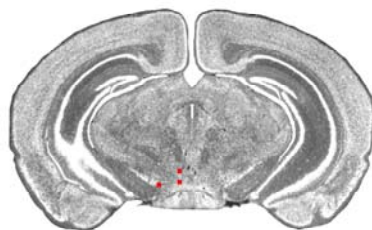

Bregma -3.40 mm

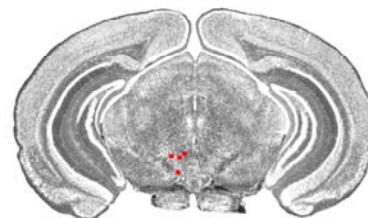

Bregma -3.60 mm

**b**

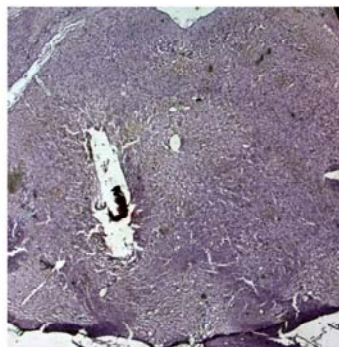

Bregma - 3.60 mm

**Suppl. Fig. 2**

## Supplemental Figure Captions

**Supplemental Figure 1a.** Placements of cannulae aimed at the VTA. The black dots indicate the location of cannulae considered to be correctly placed for the ghrelin infusion study. Red dots depict the cannulae considered to be correctly placed for the ghrelin receptor antagonist infusion study. Yellow dots represent inaccurately placed cannulae. Images were obtained from the rat brain atlas of Paxinos and Watson (1998) in stereotaxic coordinates.

**b:** Pictures of a rat brain with a cannula aimed at the VTA. The animal was infused with 0.5µl of Coomassie blue dye under deep anesthesia, and sacrificed by transcardial perfusion 20 minutes later. As seen in this picture, the infusion spread was predominantly located in the VTA.

**Supplemental Figure 2a.** Photomicrographs of the anterior, medial and caudal portions of the VTA of mice infused with saline or BIM28163 using osmotic minipumps. The red dots correspond to the localization of cannula tips in mice that were included in the statistical analyses. **b.** Example of cannula placement into the VTA of mice. This section was from an animal chronically infused with BIM28163.
